# Supplementary material for: Synthesis and properties of chiral nanoparticles based on (pS)- and (pR)-decasubstituted pillar[5]arenes containing secondary amide fragments
Source: Royal Society of Chemistry journal article supplement (doi:10.1039/c5ra25562g), 2016-01-01

**Synthesis and properties of chiral nanoparticles based on (pS) - and (pR) -  
deca-substituted pillar[5]arenes containing secondary amide fragments**

**Dmitry N. Shurpik, Pavel L. Padnya, Vladimir G. Evtugyn, Timur A.  
Mukhametzyanov, Artur A. Khannanov, Marianna P. Kutyreva and Ivan I. Stoikov\*<sup>a</sup>**

*Kazan Federal University, A.M. Butlerov Chemical Institute, 420008 Kremlevskaya, 18, Kazan,  
Russian Federation*

***Electronic Supplementary Information***

**$^1\text{H}$  NMR spectrum of 4,8,14,18,23,26,28,31,32,35-deca-[(R)-(+)-(1'-phenylethyl-1'-amidocarbonyl)methoxy]-pillar[5]arene (2), DMSO- $d_6$ , 298 K, 400 MHz**

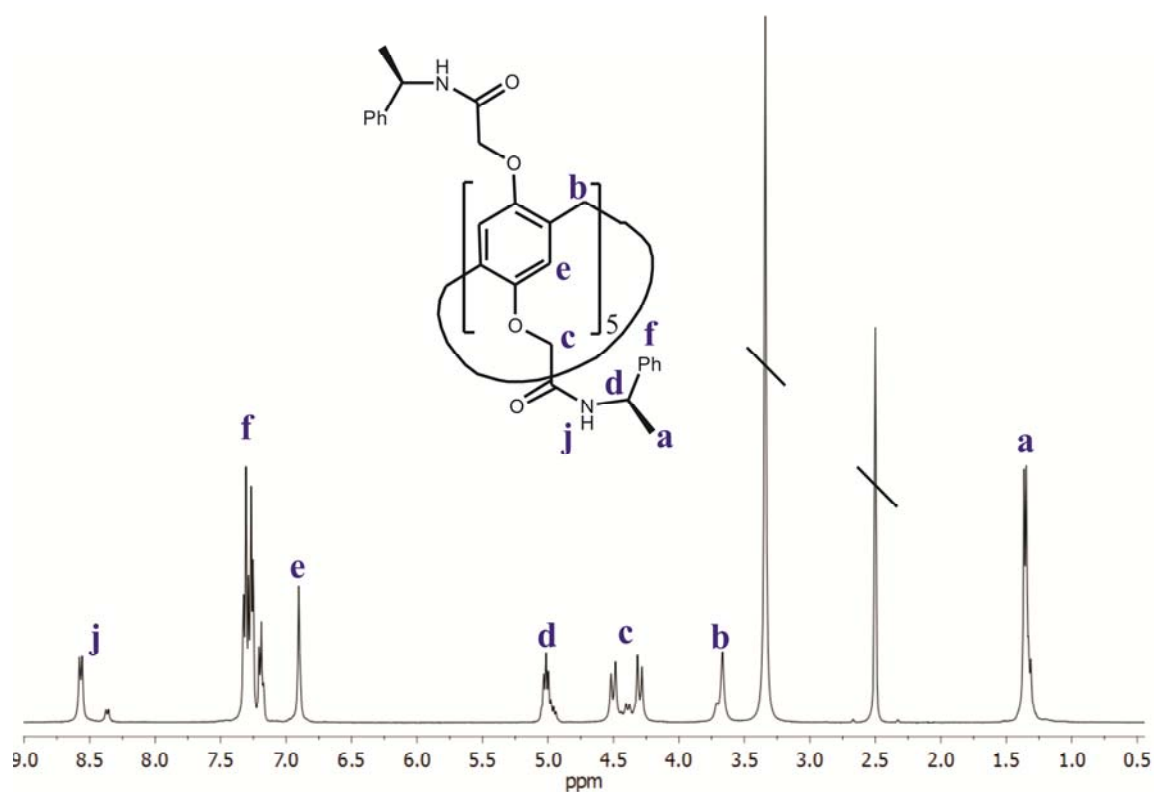

**$^1\text{H}$  NMR spectrum of 4,8,14,18,23,26,28,31,32,35-deca-[(S)-(-)-(1'-phenylethyl-1'-amidocarbonyl)methoxy]-pillar[5]arene (3), DMSO- $d_6$ , 298 K, 400 MHz**

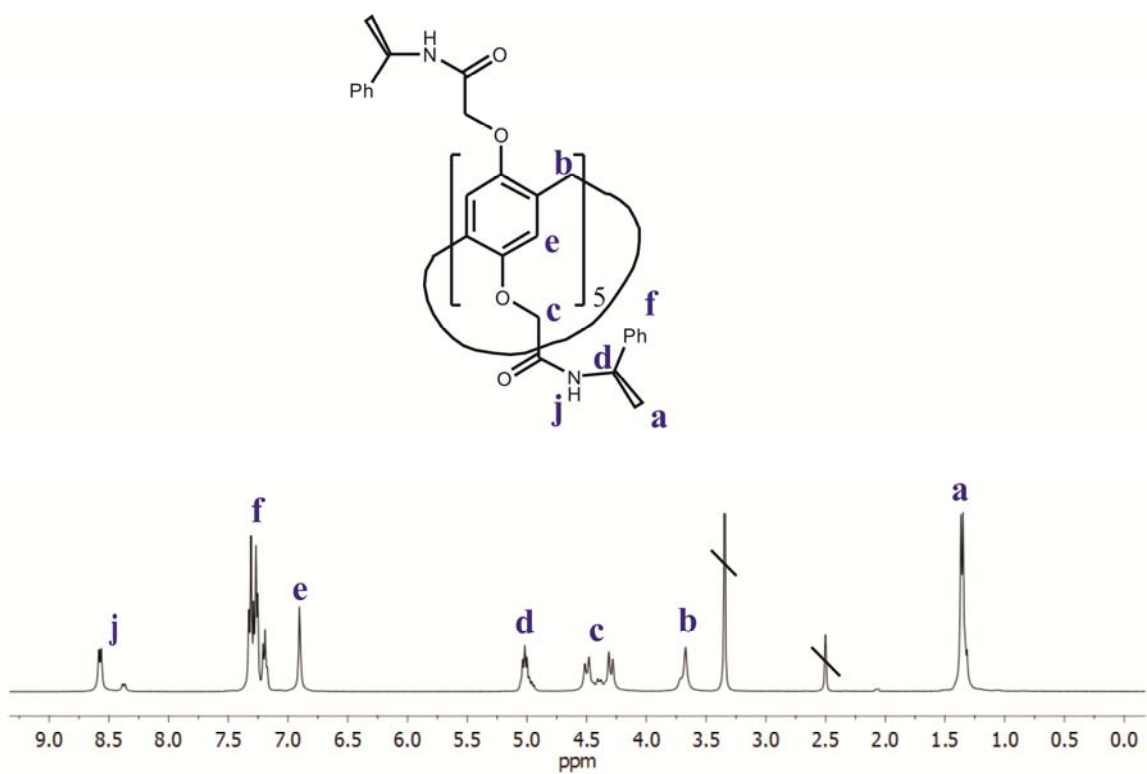

**$^1\text{H}$ - $^1\text{H}$  NOESY NMR spectrum of 4,8,14,18,23,26,28,31,32,35-deca-[(R)-(+)-(1'-phenylethyl-1'-amidocarbonyl)methoxy]-pillar[5]arene (2), DMSO- $d_6$ , 298 K, 400 MHz**

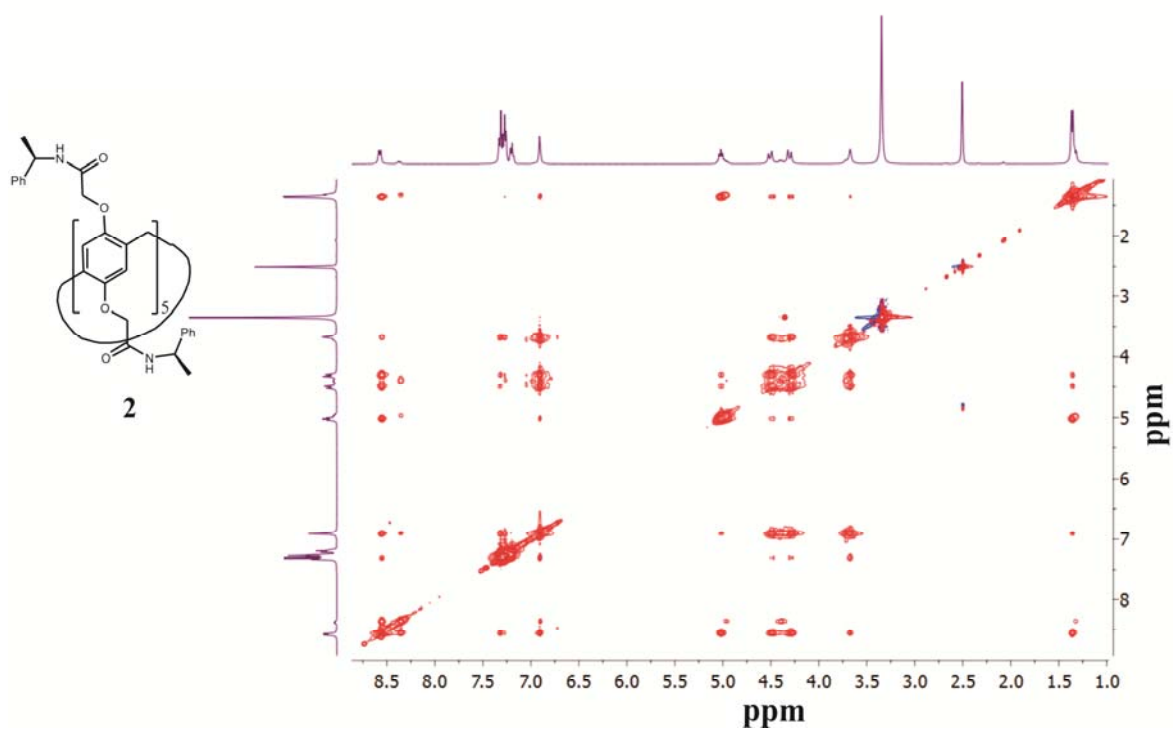

**$^1\text{H}$ - $^1\text{H}$  NOESY NMR spectrum of 4,8,14,18,23,26,28,31,32,35-deca-[(S)-(-)-(1'-phenylethyl-1'-amidocarbonyl)methoxy]-pillar[5]arene (3), DMSO- $d_6$ , 298 K, 400 MHz**

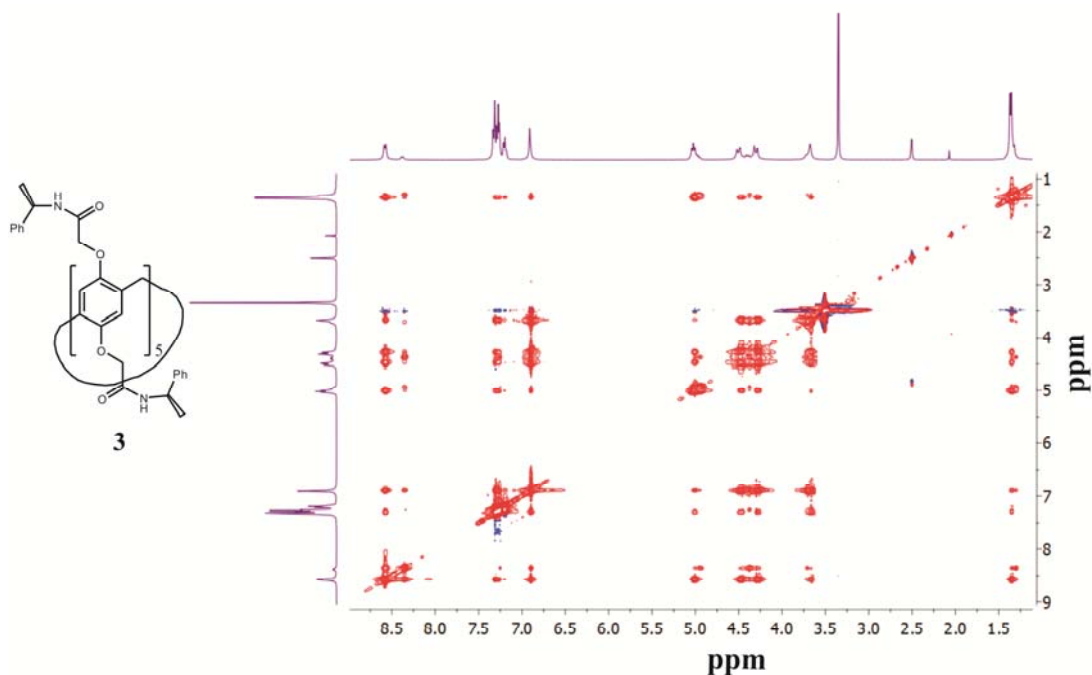

$^{13}\text{C}$  NMR spectrum of 4,8,14,18,23,26,28,31,32,35-deca-[(R)-(+)-(1'-phenylethyl-1'-amidocarbonyl)methoxy]-pillar[5]arene (2), DMSO- $d_6$ , 298 K, 100 MHz

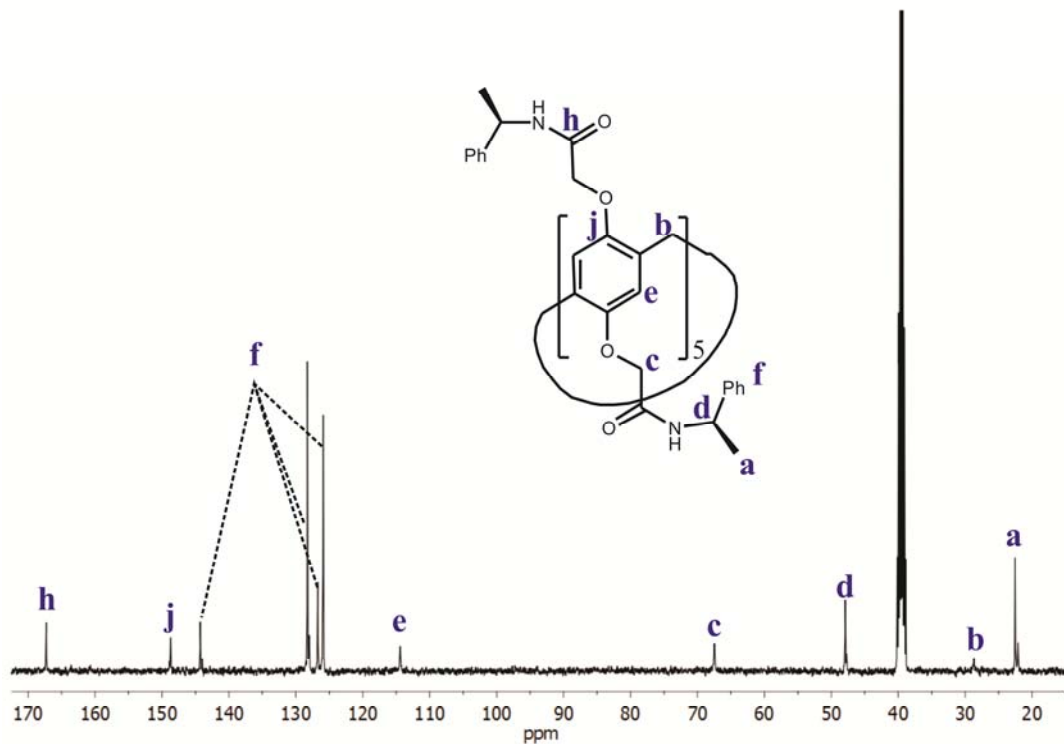

$^{13}\text{C}$  NMR spectrum of 4,8,14,18,23,26,28,31,32,35-deca-[(S)-(-)-(1'-phenylethyl-1'-amidocarbonyl)methoxy]-pillar[5]arene (3), DMSO- $d_6$ , 298 K, 100 MHz

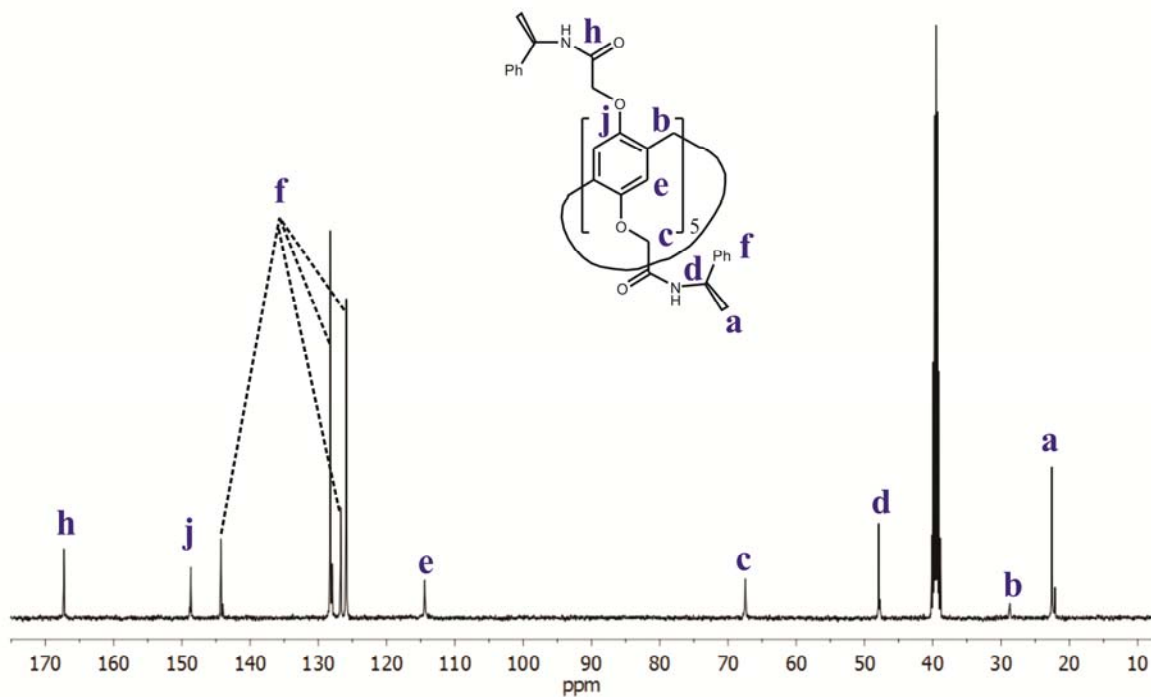

**Mass spectrum (MALDI-TOF, 4-nitroaniline matrix) of 4,8,14,18,23,26,28,31,32,35-deca-[(R)-(+)-(1'-phenylethyl-1'-amidocarbonyl)methoxy]-pillar[5]arene (2).**

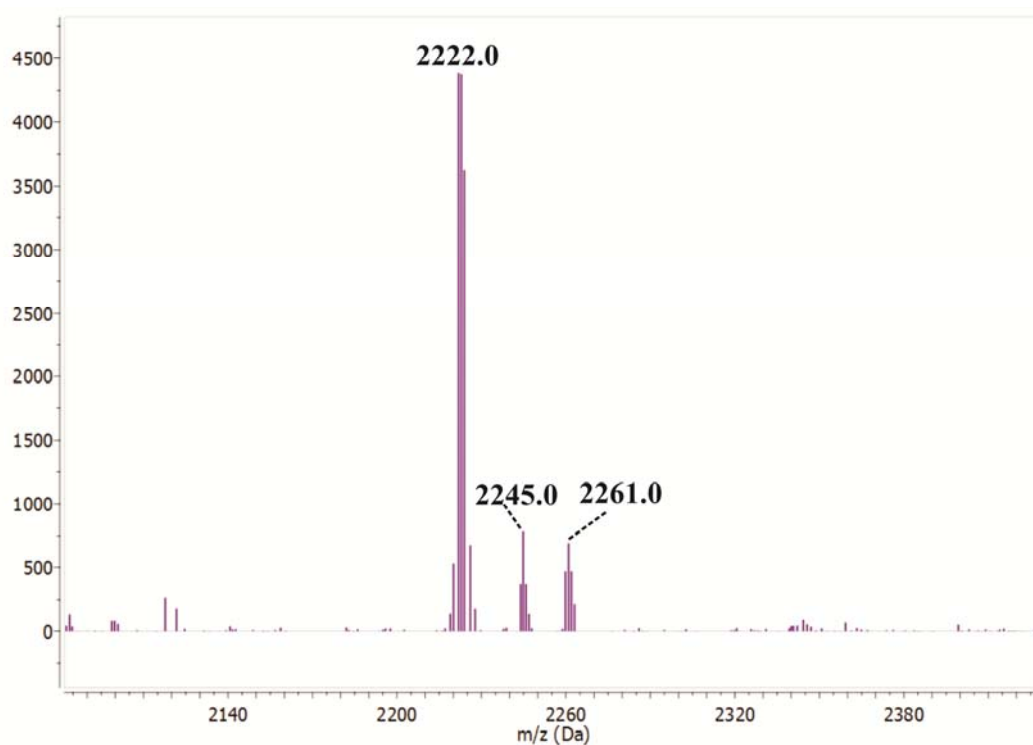

**Mass spectrum (MALDI-TOF, 4-nitroaniline matrix) of 4,8,14,18,23,26,28,31,32,35-deca-[(S)-(-)-(1'-phenylethyl-1'-amidocarbonyl)methoxy]-pillar[5]arene (3).**

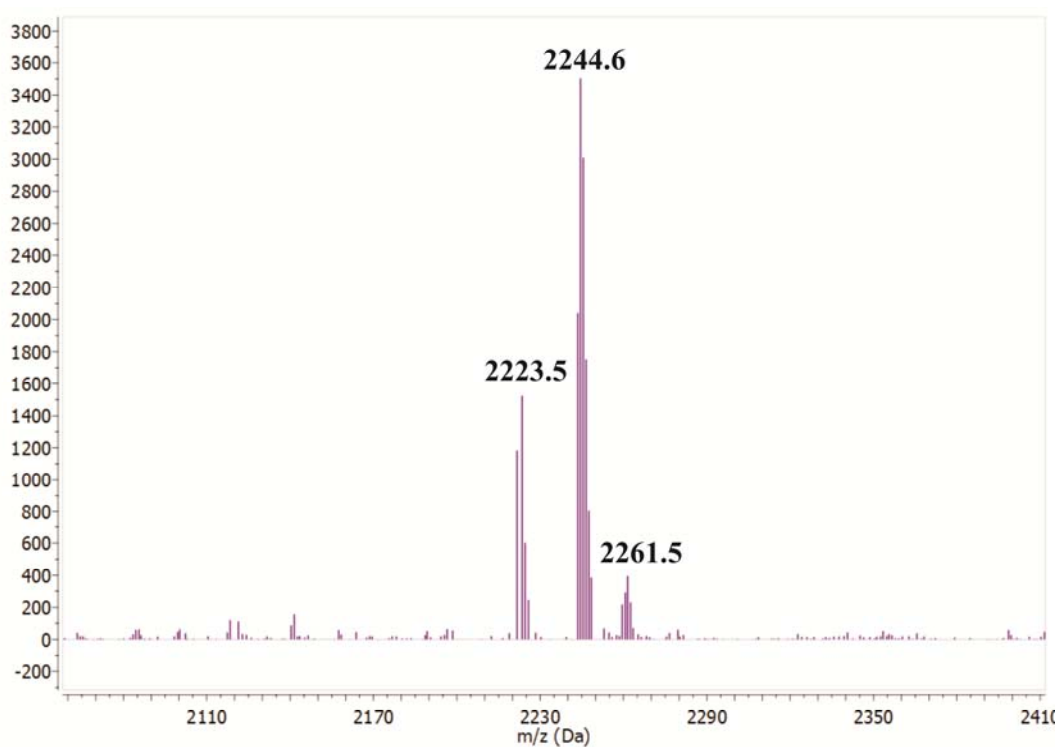

**IR spectrum of 4,8,14,18,23,26,28,31,32,35-deca-[(R)-(+)-(1'-phenylethyl-1'-amidocarbonyl)methoxy]-pillar[5]arene (2).**

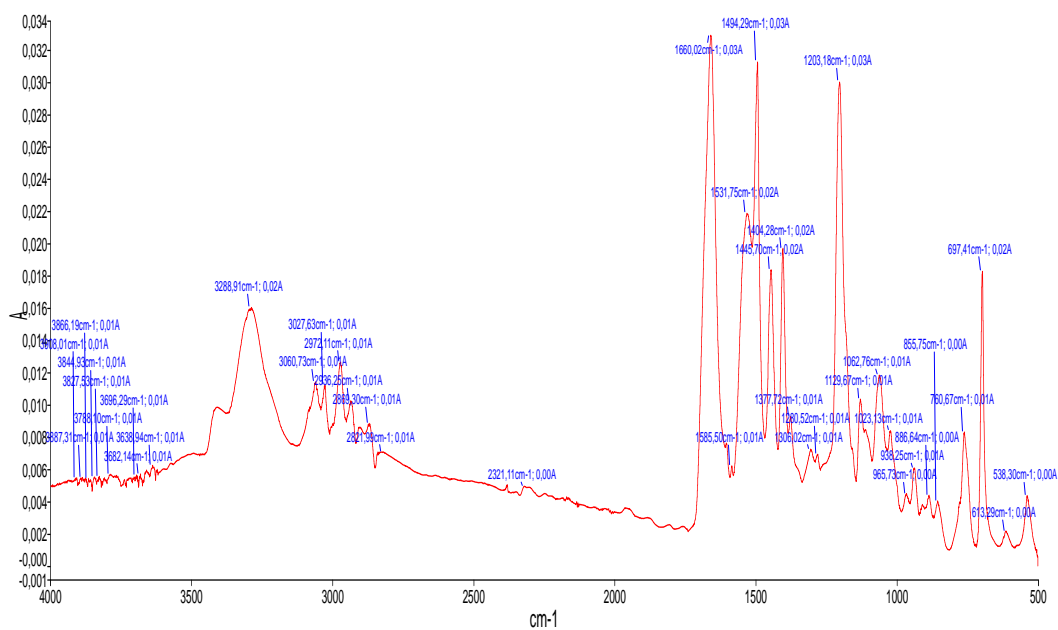

**IR spectrum of 4,8,14,18,23,26,28,31,32,35-deca-[(S)-(-)-(1'-phenylethyl-1'-amidocarbonyl)methoxy]-pillar[5]arene (3).**

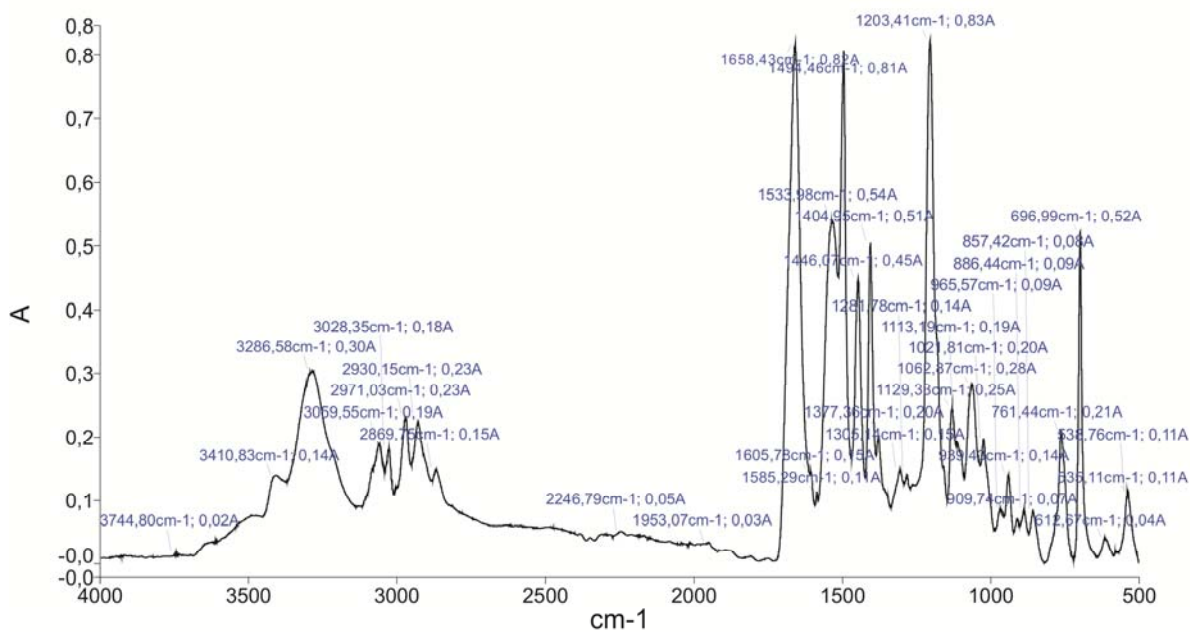

**Table S1.** Size of particles based on self-associates obtained with macrocycles **2** and **3** by using NTA method.

| Compound | Time (days) | Bin Centre (nm) | Concentration ( $10^6$ particles/ml) | Average $D_h$ (nm) | Average concentration ( $10^6$ particles/ml) |
|----------|-------------|-----------------|--------------------------------------|--------------------|----------------------------------------------|
| 2        | 1           | 10              | 7.056                                | $120.9 \pm 26$     | $193 \pm 21$                                 |
|          |             | 30              | 10.827                               |                    |                                              |
|          |             | 50              | 7.478                                |                    |                                              |
|          |             | 70              | 6.006                                |                    |                                              |
|          |             | 90              | 5.378                                |                    |                                              |
|          |             | 110             | 5.031                                |                    |                                              |
|          |             | 130             | 5.266                                |                    |                                              |
|          |             | 150             | 5.342                                |                    |                                              |
|          |             | 170             | 5.786                                |                    |                                              |
|          |             | 190             | 4.674                                |                    |                                              |
|          |             | 210             | 5.211                                |                    |                                              |
|          |             | 230             | 4.945                                |                    |                                              |
|          |             | 250             | 4.770                                |                    |                                              |
|          |             | 270             | 4.143                                |                    |                                              |
|          |             | 290             | 3.946                                |                    |                                              |
|          |             | 310             | 4.097                                |                    |                                              |
|          |             | 330             | 3.930                                |                    |                                              |
|          |             | 350             | 3.682                                |                    |                                              |
| 370      | 3.350       |                 |                                      |                    |                                              |
| 390      | 2.781       |                 |                                      |                    |                                              |
| 410      | 1.997       |                 |                                      |                    |                                              |
| 3        | 1           | 10              | 0.277143                             | $84.9 \pm 0.6$     | $256 \pm 13$                                 |
|          |             | 30              | 3.063906                             |                    |                                              |
|          |             | 50              | 10.82114                             |                    |                                              |
|          |             | 70              | 21.50186                             |                    |                                              |
|          |             | 90              | 23.46743                             |                    |                                              |
|          |             | 110             | 18.21214                             |                    |                                              |
|          |             | 130             | 15.20357                             |                    |                                              |
|          |             | 150             | 13.95486                             |                    |                                              |
|          |             | 170             | 10.91029                             |                    |                                              |
|          |             | 190             | 8.756857                             |                    |                                              |
|          |             | 210             | 5.8                                  |                    |                                              |
|          |             | 230             | 4.326                                |                    |                                              |
|          |             | 250             | 3.034963                             |                    |                                              |
|          |             | 270             | 1.729857                             |                    |                                              |
|          |             | 290             | 1.227596                             |                    |                                              |
|          |             | 310             | 0.849999                             |                    |                                              |
|          |             | 330             | 0.922233                             |                    |                                              |
|          |             | 350             | 1.021327                             |                    |                                              |
| 370      | 0.867843    |                 |                                      |                    |                                              |
| 390      | 0.43192     |                 |                                      |                    |                                              |
| 410      | 0.00033     |                 |                                      |                    |                                              |
| 430      | 0.000135    |                 |                                      |                    |                                              |

|     |      |     |        |            |            |
|-----|------|-----|--------|------------|------------|
|     |      | 450 | 0      |            |            |
| 2   | 7    | 10  | 49.31  | 56.4 ± 3.6 | 1530 ± 128 |
|     |      | 30  | 197.60 |            |            |
|     |      | 50  | 178.31 |            |            |
|     |      | 70  | 129.35 |            |            |
|     |      | 90  | 93.37  |            |            |
|     |      | 110 | 60.26  |            |            |
|     |      | 130 | 42.19  |            |            |
|     |      | 150 | 32.99  |            |            |
|     |      | 170 | 17.12  |            |            |
|     |      | 190 | 6.70   |            |            |
|     |      | 210 | 3.86   |            |            |
|     |      | 230 | 3.91   |            |            |
|     |      | 250 | 3.62   |            |            |
|     |      | 270 | 2.19   |            |            |
|     |      | 290 | 1.02   |            |            |
|     |      | 310 | 0.80   |            |            |
|     |      | 330 | 0.28   |            |            |
|     |      | 350 | 0.00   |            |            |
|     |      | 370 | 0.00   |            |            |
|     |      | 390 | 0.27   |            |            |
| 410 | 0.00 |     |        |            |            |
| 430 | 0.00 |     |        |            |            |
| 450 | 0.00 |     |        |            |            |
| 3   | 7    | 10  | 15.05  | 67.2 ± 7.4 | 1680 ± 21  |
|     |      | 30  | 126.31 |            |            |
|     |      | 50  | 172.81 |            |            |
|     |      | 70  | 165.27 |            |            |
|     |      | 90  | 154.26 |            |            |
|     |      | 110 | 125.60 |            |            |
|     |      | 130 | 79.42  |            |            |
|     |      | 150 | 52.52  |            |            |
|     |      | 170 | 33.14  |            |            |
|     |      | 190 | 20.01  |            |            |
|     |      | 210 | 12.11  |            |            |
|     |      | 230 | 8.46   |            |            |
|     |      | 250 | 5.57   |            |            |
|     |      | 270 | 2.34   |            |            |
|     |      | 290 | 1.82   |            |            |
|     |      | 310 | 1.41   |            |            |
|     |      | 330 | 0.81   |            |            |
|     |      | 350 | 0.60   |            |            |
|     |      | 370 | 0.45   |            |            |
|     |      | 390 | 0.35   |            |            |
| 410 | 0.00 |     |        |            |            |
| 430 | 0.00 |     |        |            |            |
| 450 | 0.00 |     |        |            |            |
| 470 | 0.00 |     |        |            |            |



Variable-temperature UV spectra of 4,8,14,18,23,26,28,31,32,35-deca-[(R)-(+)-(1'-phenylethyl-1'-amidocarbonyl)methoxy]-pillar[5]arene (**2**), in DMSO ( $C=1 \times 10^{-4}$  M).

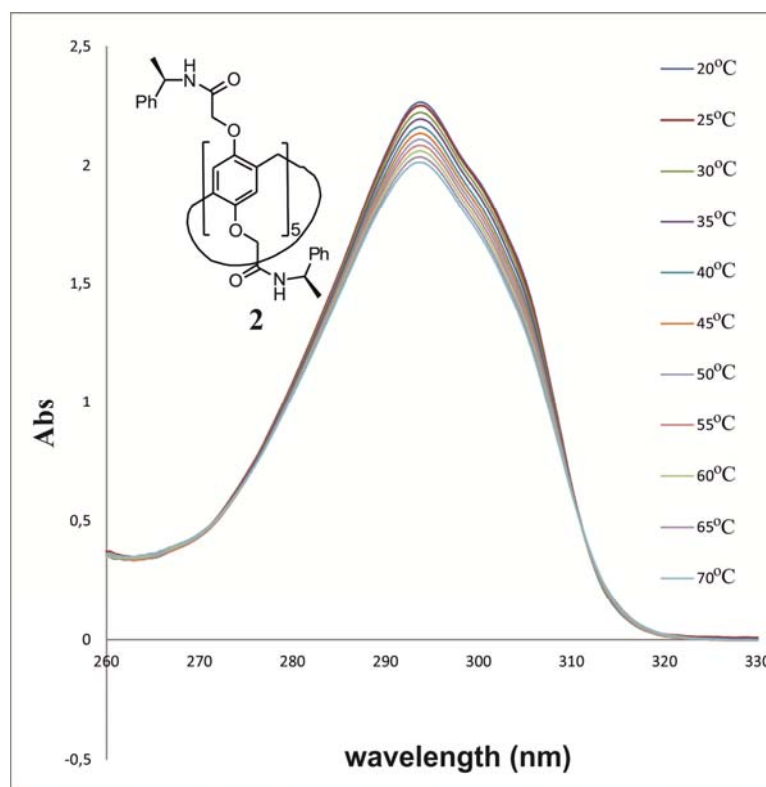

Variable-temperature UV spectra of 4,8,14,18,23,26,28,31,32,35-deca-[(S)-(-)-(1'-phenylethyl-1'-amidocarbonyl)methoxy]-pillar[5]arene (**3**), in DMSO ( $C=1 \times 10^{-4}$  M).

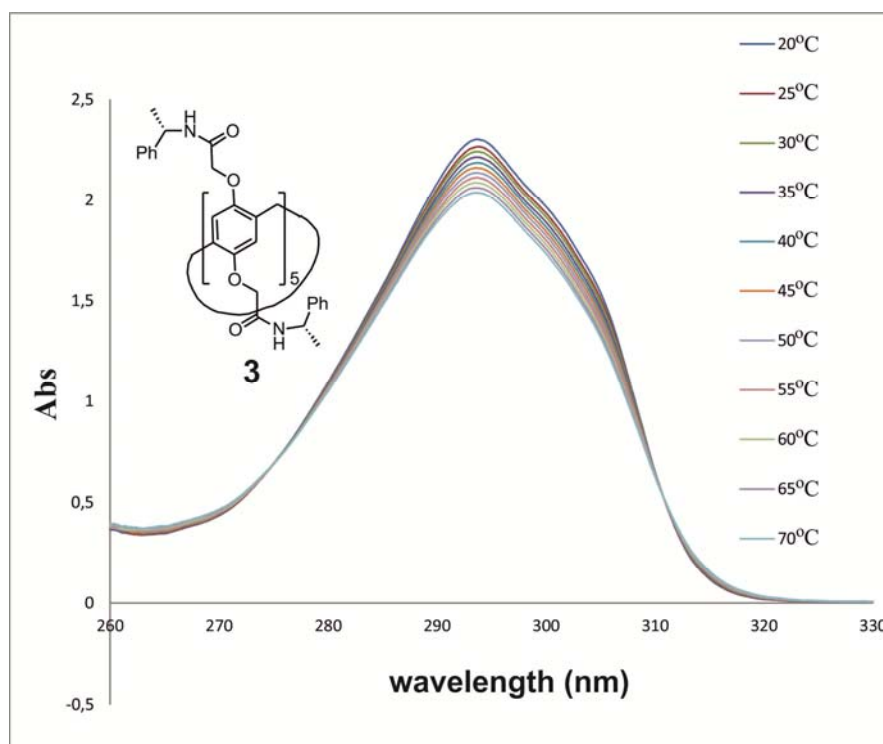

The CD and UV spectra of the (S)-N-(1-phenylethyl)acetamide (**4**) (model compound) in CHCl<sub>3</sub> (C = 1×10<sup>-4</sup> M) at 25 °C

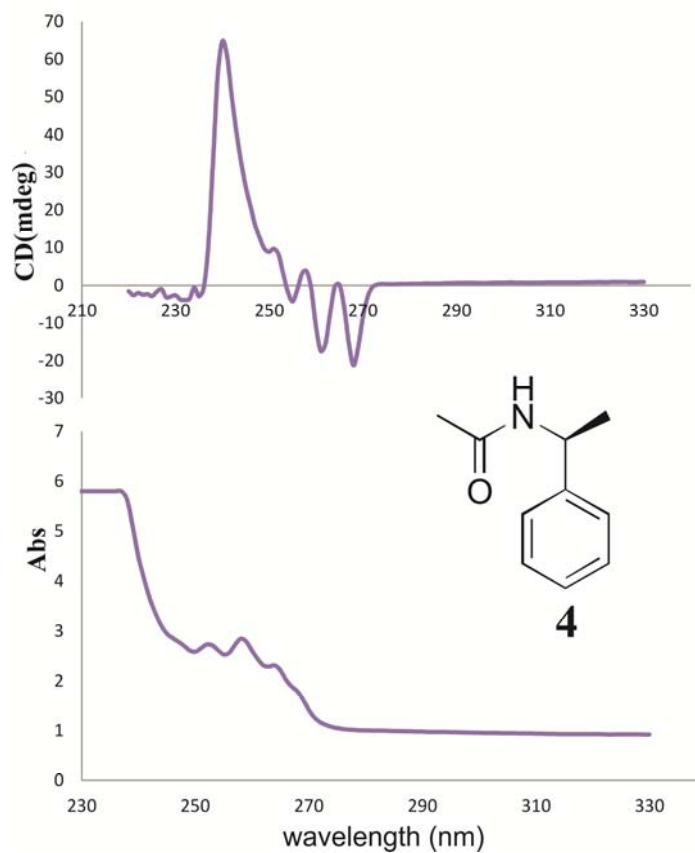

Variable-temperature UV spectra of 4,8,14,18,23,26,28,31,32,35-deca-[(R)-(+)-(1'-phenylethyl-1'-amidocarbonyl)methoxy]-pillar[5]arene (**2**), in CHCl<sub>3</sub> (C = 1×10<sup>-4</sup> M).

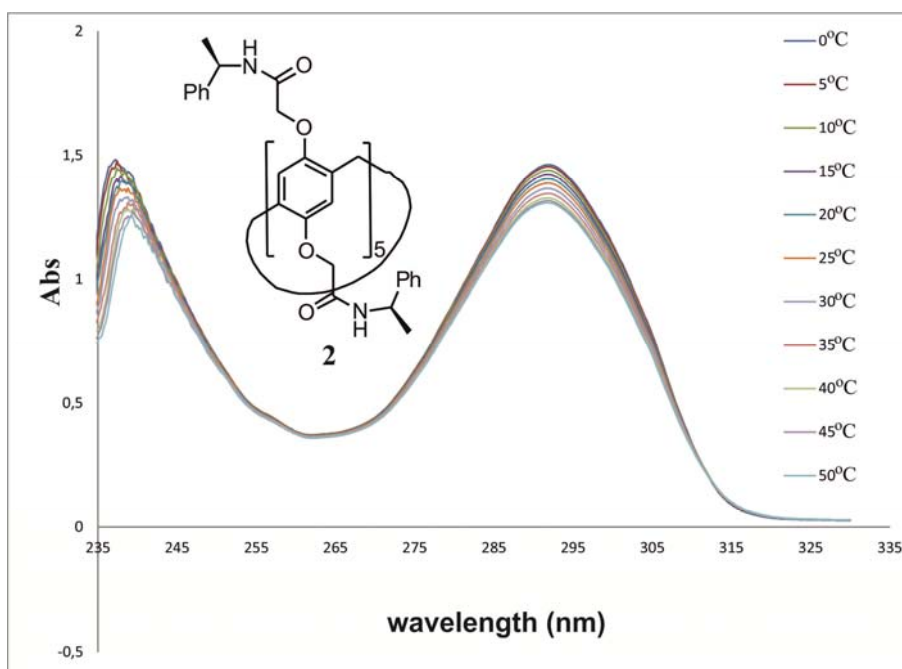

Variable-temperature UV spectra of 4,8,14,18,23,26,28,31,32,35-deca-[(S)-(-)-(1'-phenylethyl-1'-amidocarbonyl)methoxy]-pillar[5]arene (**3**), in CHCl<sub>3</sub> (C = 1×10<sup>-4</sup> M).

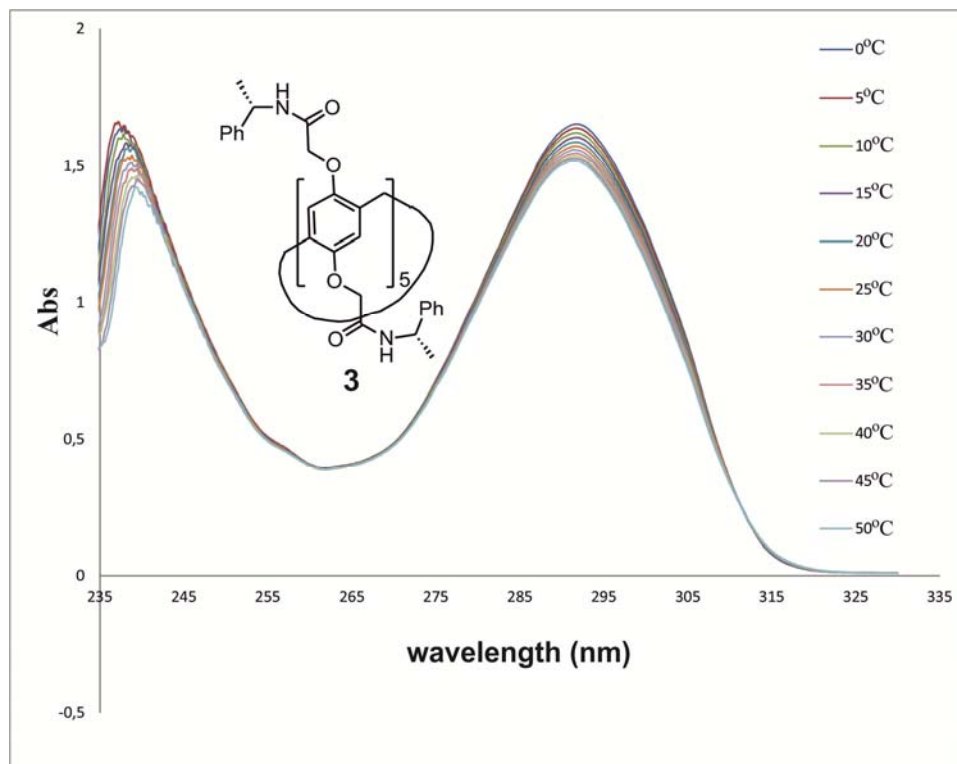

Table S2. Dependence of equilibrium constant on temperature for pSR / pRS and pRR / pSS diastereomers.

| Temperature °C | the proportion of form pSR / pRS in% | the proportion of form pRR / pSS in % | Temperature K | 1/T     | lnK     |
|----------------|--------------------------------------|---------------------------------------|---------------|---------|---------|
| 30             | 80                                   | 20                                    | 303.15        | 0.00330 | 1.38629 |
| 40             | 74                                   | 26                                    | 313.15        | 0.00319 | 1.04597 |
| 50             | 70                                   | 30                                    | 323.15        | 0.00309 | 0.84730 |
| 60             | 65                                   | 35                                    | 333.15        | 0.00300 | 0.61904 |
| 70             | 58                                   | 42                                    | 343.15        | 0.00291 | 0.32277 |
| 72             | 57                                   | 43                                    | 345.15        | 0.00290 | 0.28185 |

### Van't hoff plot

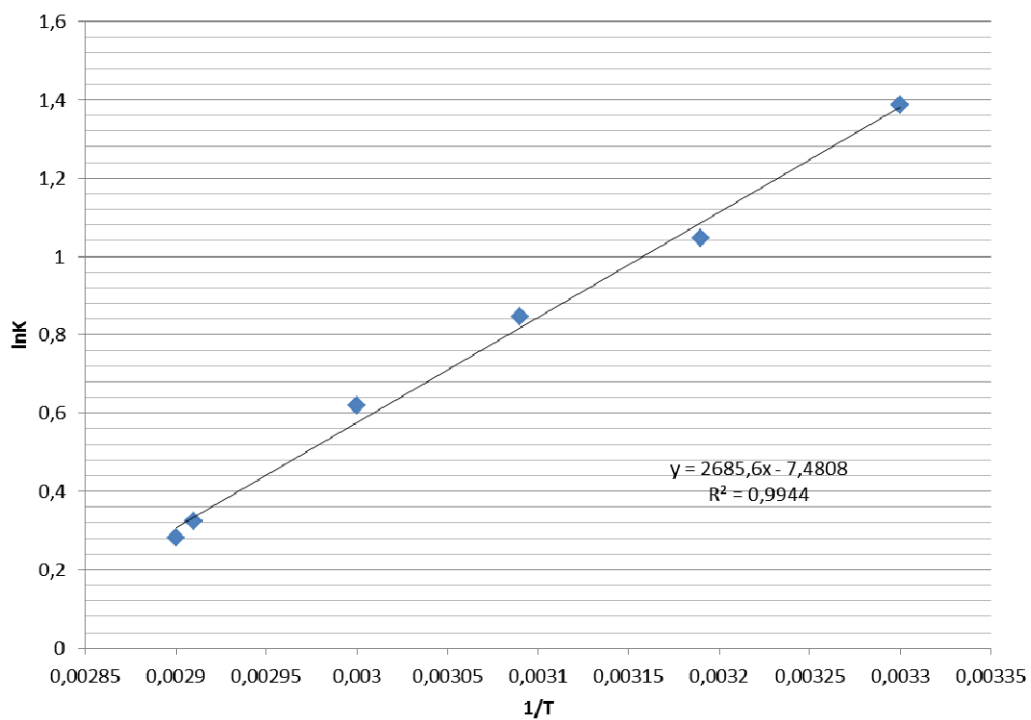

Supplement: c5ra25562g7.pdf [file c5ra25562g7.pdf]
